# Supplementary figures and images for: Channel-free shear driven circular liquid chromatography
Source: Royal Society of Chemistry journal article supplement (doi:10.1039/b809420a), 2008-01-01

Fig. S1

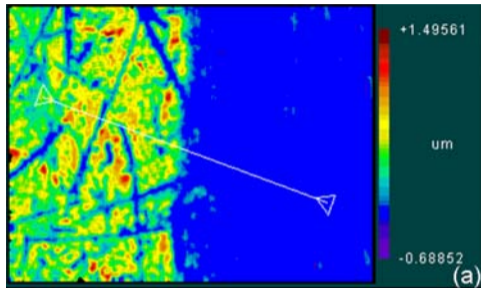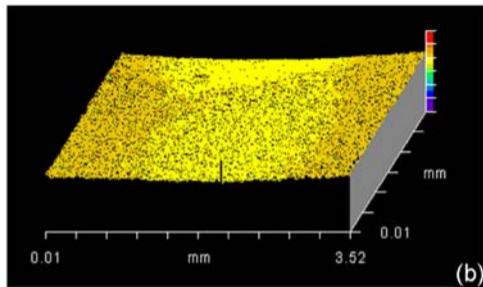

Fig. S2

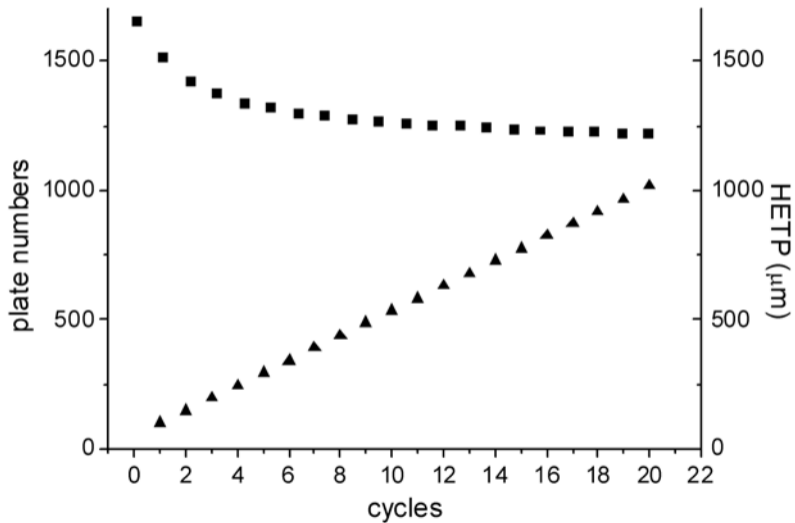

Supplement: b809420a.pdf [file b809420a.pdf]
